# Supplementary figures and images for: A feedback mechanism converts individual cell features into a supracellular ECM structure in Drosophila trachea
Source: eLife journal article supplement (doi:10.7554/elife.09373), 2016-02-02

Öztürk-Çolak et al Fig. 9 - figure supplement 1

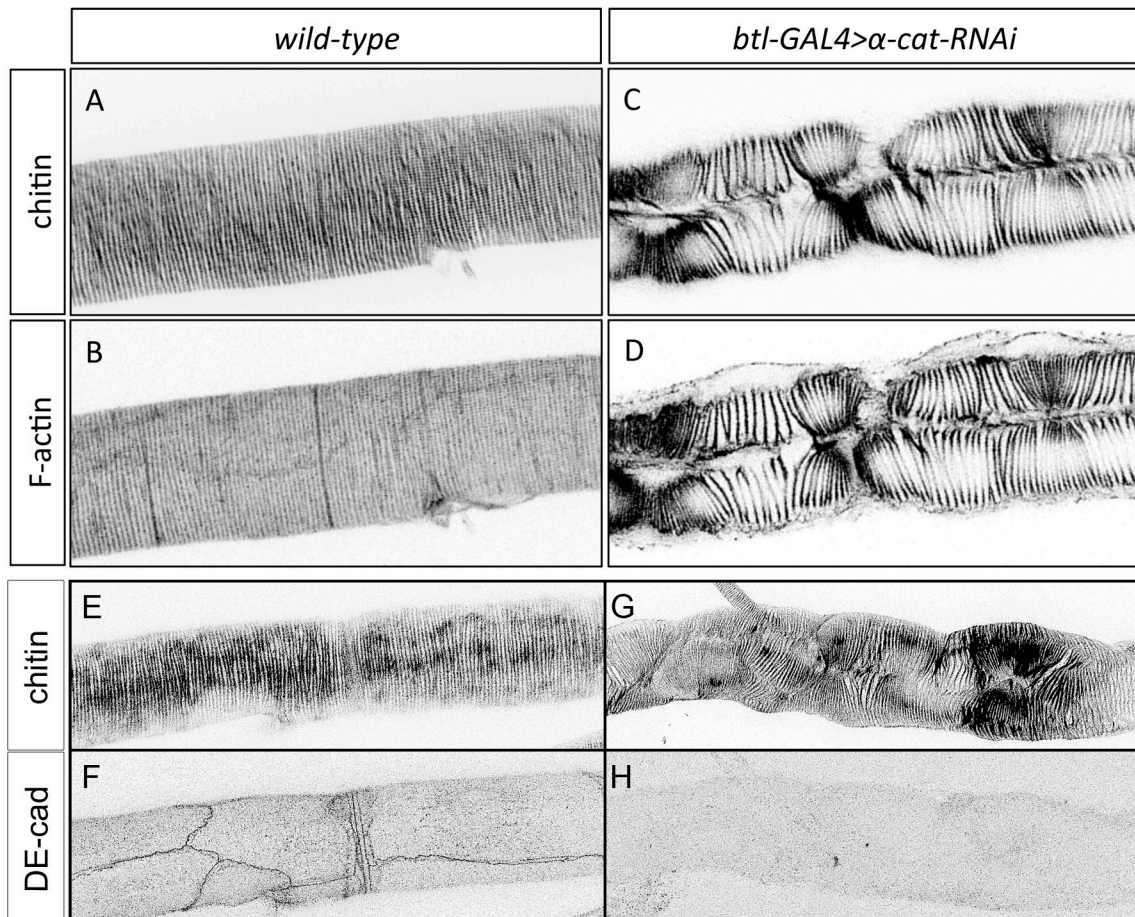

Supplement: supp [file elife-09373-supp-v1.zip]

Öztürk-Çolak et al Fig. 3 supplemental 1

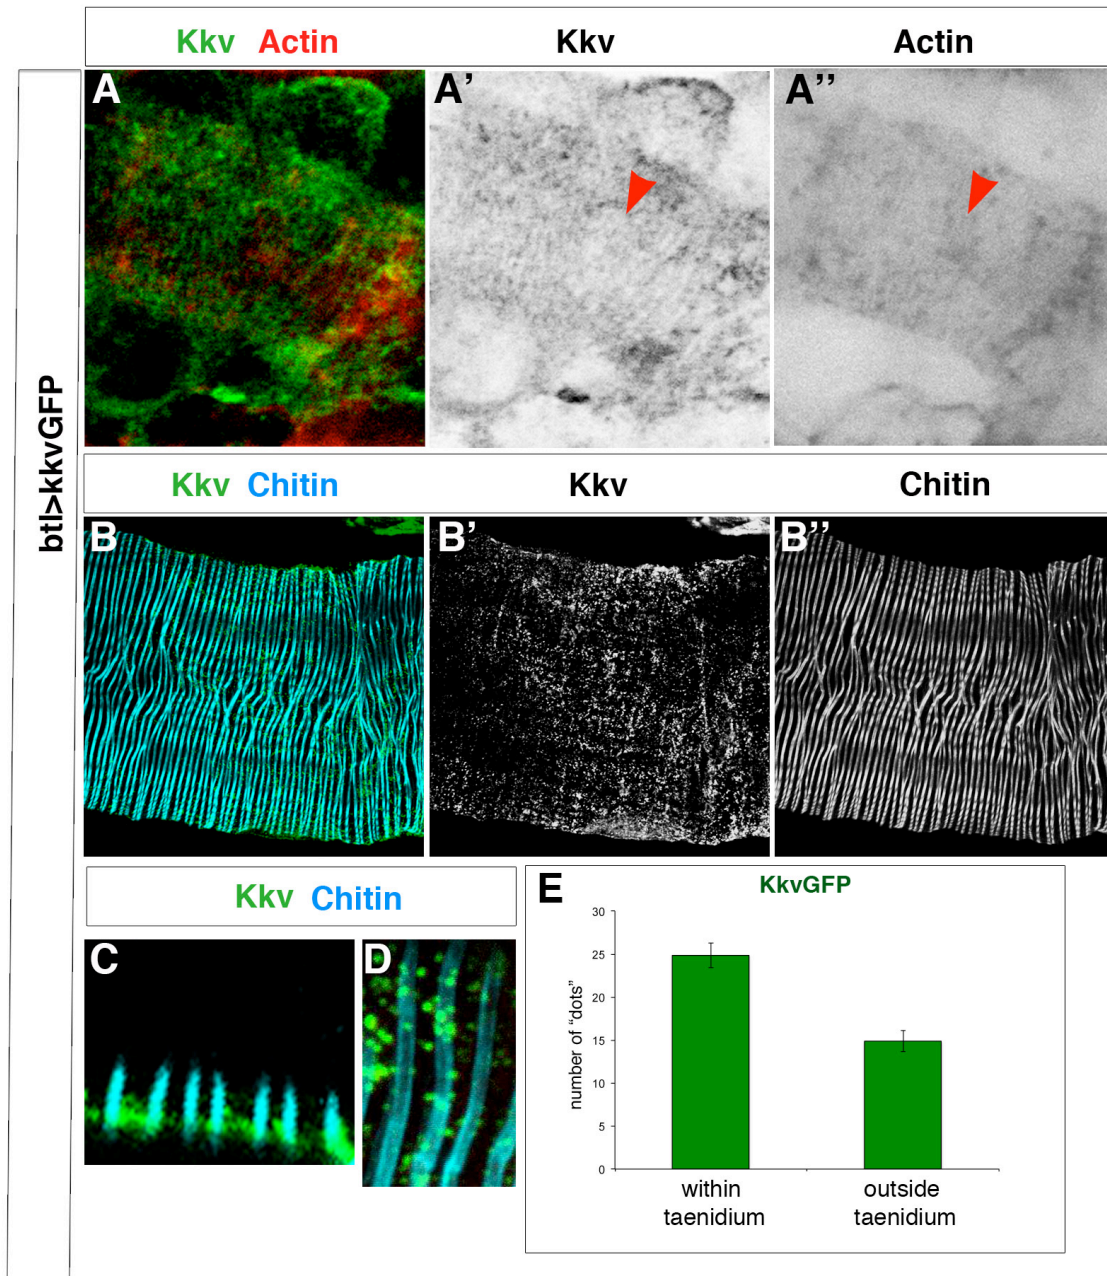

Supplement: supp [file elife-09373-supp-v1.zip]

Öztürk-Çolak et al Fig. 10 - figure supplement 1

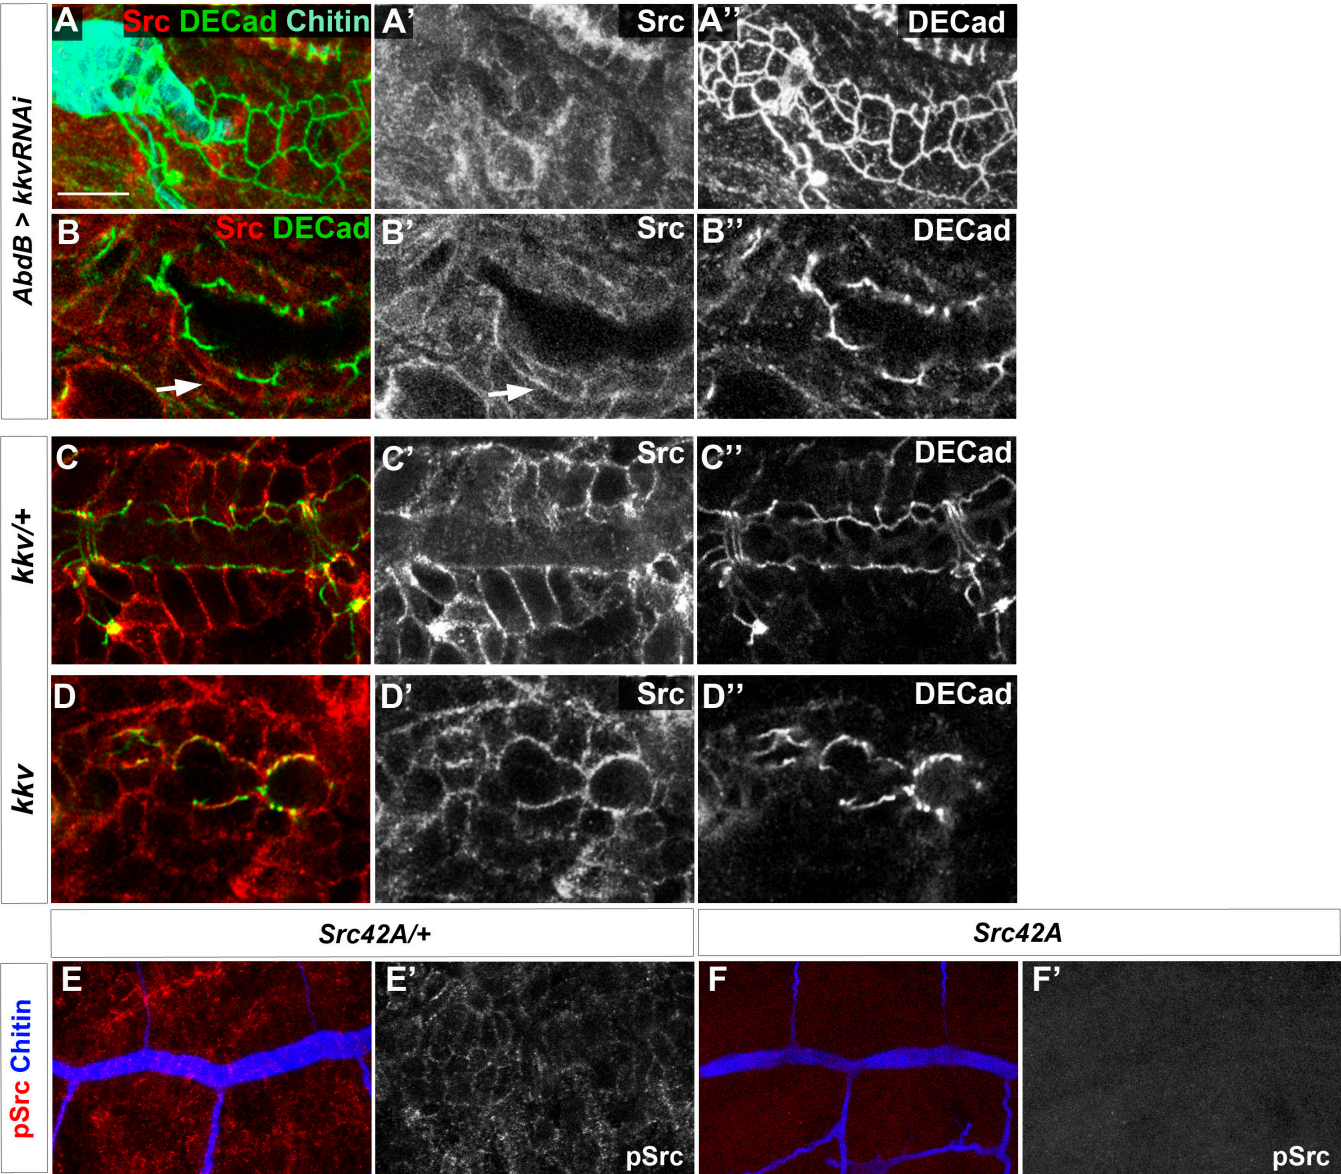

Supplement: supp [file elife-09373-supp-v1.zip]

Öztürk-Çolak et al Fig. 1 - figure supplement 1

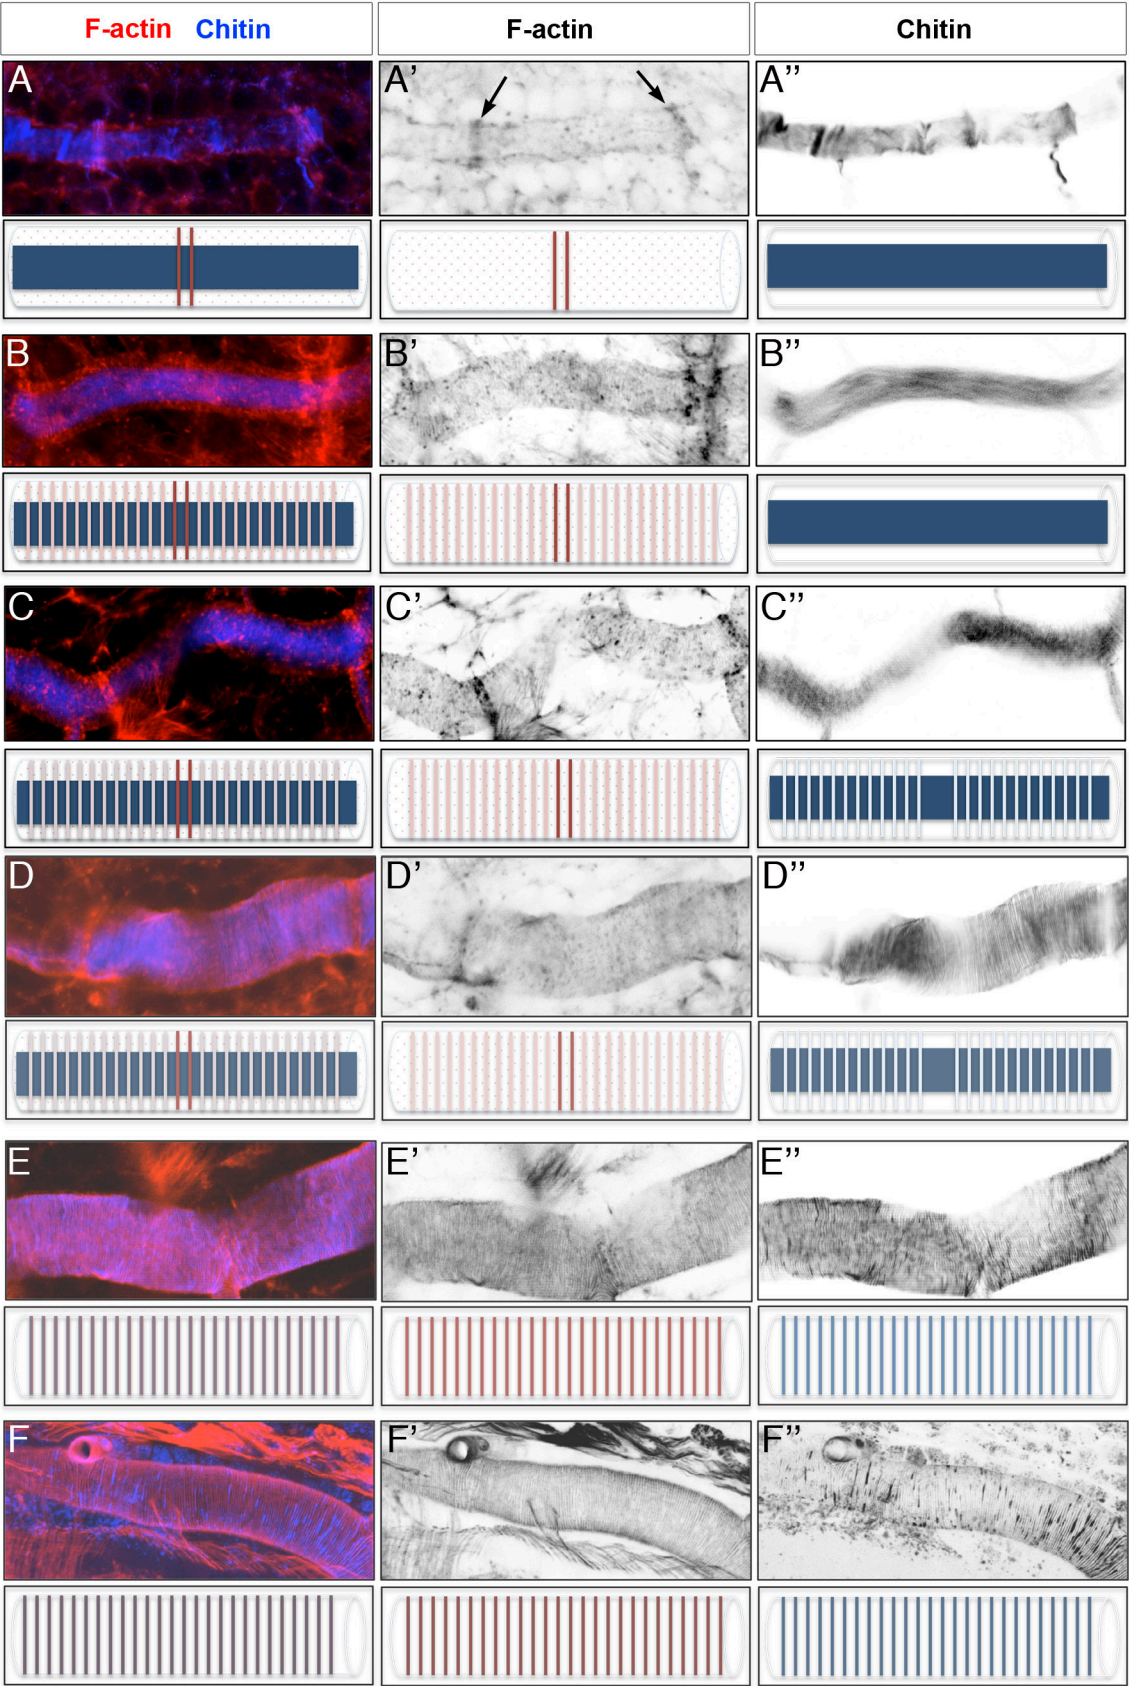

Supplement: supp [file elife-09373-supp-v1.zip]
